# Supplementary material for: Strong coupling and induced transparency at room temperature with single quantum dots and gap plasmons
Source: PubMed Central journal article supplement (PMC6167320; doi:10.1038/s41467-018-06450-4), 2018-10-01
Supplement: 41467_2018_6450_MOESM1_ESM.pdf [file 41467_2018_6450_MOESM1_ESM.pdf]

# Supplementary Information for Strong coupling and induced transparency at room temperature with single quantum dots and gap plasmons

Haixu Leng,<sup>1</sup> Brian Szychowski,<sup>2</sup> Marie-Christine Daniel,<sup>2</sup> and Matthew Pelton<sup>1,\*</sup>

<sup>1</sup>Department of Physics, UMBC (University of Maryland, Baltimore County), Baltimore, MD 21250, U.S.A.

<sup>2</sup>Department of Chemistry & Biochemistry, UMBC (University of Maryland, Baltimore County), Baltimore, MD, 21250, U.S.A.

\*Corresponding author. Email: mpelton@umbc.edu

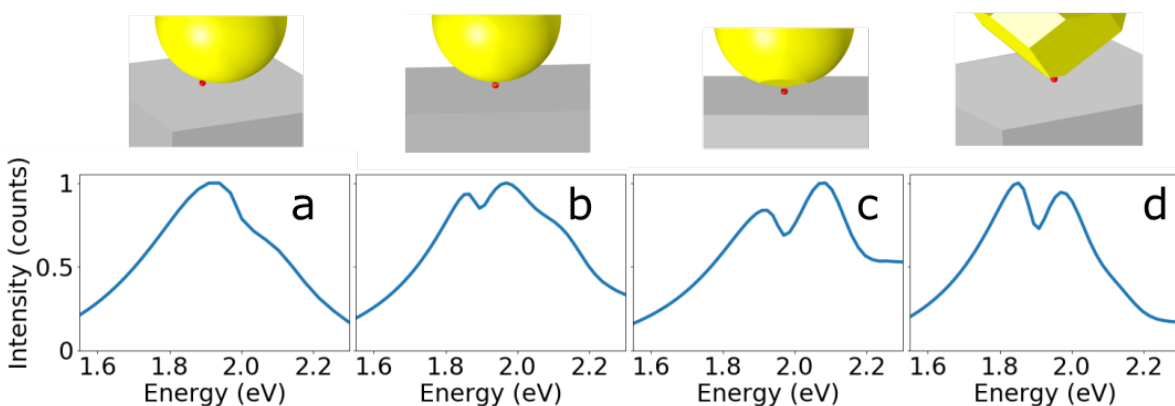

**Supplementary Figure 1: Finite-element simulations of coupled quantum-dot / gap-plasmon systems in different coupling regimes. a** Quantum dot located next to the gap between a spherical gold nanoparticle and a silver film. **b** Quantum dot in the gap between a spherical gold nanoparticle and a silver film. **c** Quantum dot in the gap between the edge of a faceted gold nanoparticle and a silver film. The facets are formed by truncating a spherical particle with planes. **d** Quantum dot in the gap between the apex of a faceted gold nanoparticle (approximated as a polygon) and a silver film. The top panels show the simulated structures; gold nanoparticles are in yellow, quantum dots are in red, and silver films are in grey. The bottom panels show the simulated scattering spectra.

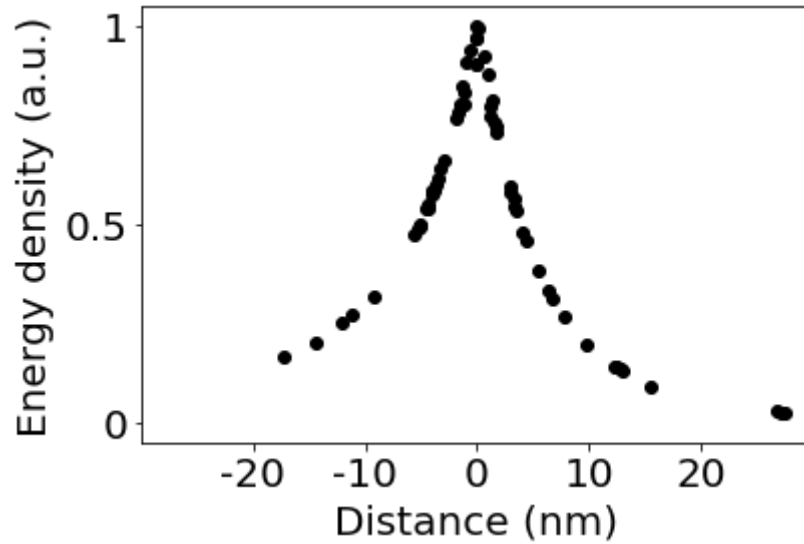

**Supplementary Figure 2: Lateral field localization for a gap plasmon.** The plot shows the calculated electromagnetic energy density in the gap between a faceted gold nanoparticle and a silver film, as a function of lateral distance (parallel to the surface of the film).

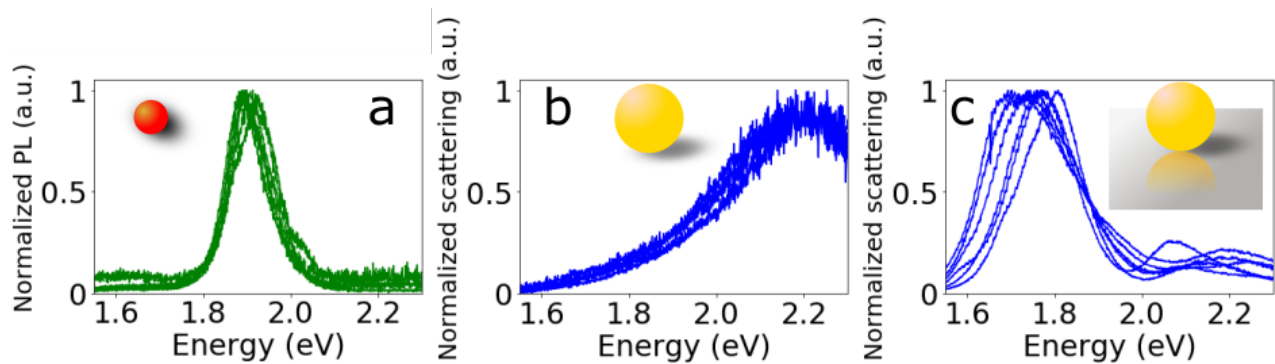

**Supplementary Figure 3: Reference spectra for uncoupled particles.** **a**, Photoluminescence from several isolated quantum dots. **b**, Scattering spectra of several isolated quasi-spherical gold nanoparticles. **c**, Scattering spectra of several individual gold nanoparticles on a silver film (without quantum dots).

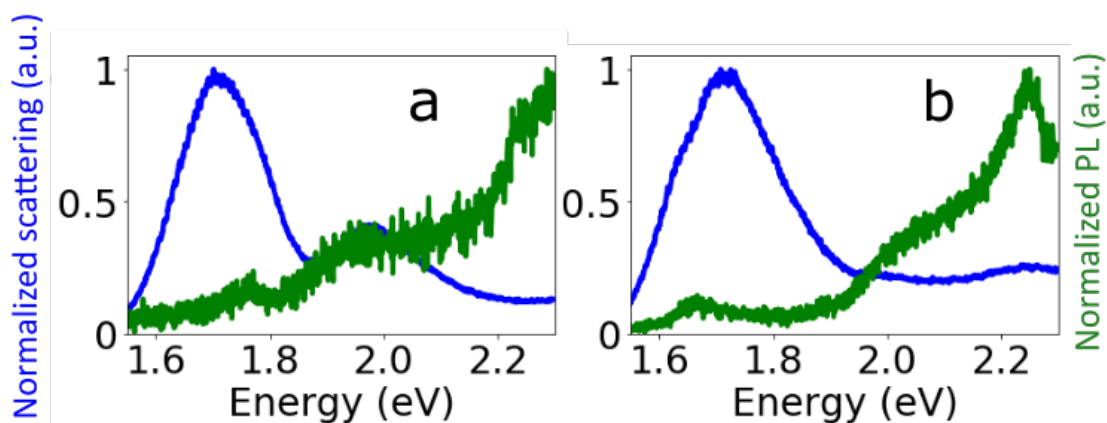

**Supplementary Figure 4: Photoluminescence from gap plasmons.** Scattering (blue) and photoluminescence (green) spectra from gold nanoparticles on a silver film, without quantum dots. **a** and **b** show representative examples for two different nanoparticles.

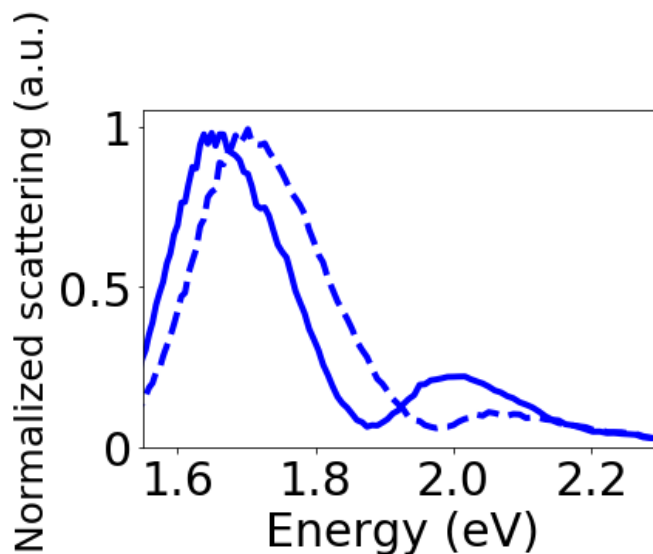

**Supplementary Figure 5: Shift of the gap plasmon under intense laser illumination.** Scattering spectrum from a gold nanoparticle on a silver film, without quantum dots, before (solid line) and after (dashed line) illumination for 30 seconds with 0.4 mW of 515-nm laser light focused to a 5  $\mu\text{m}$  spot.

**Supplementary Table 1: Parameters obtained from fitting of experimental scattering spectra.** Quantum dot resonance frequency,  $\omega_{\text{QD}}$ , quantum dot decay rate,  $\gamma_{\text{QD}}$ , plasmon resonance frequency,  $\omega_{\text{SP}}$ , plasmon decay rate,  $\gamma_{\text{SP}}$ , and coupling strength,  $g$ . All values are in units of eV.

|                                       | $\omega_{\text{SP}}$ | $\omega_{\text{QD}}$ | $\gamma_{\text{SP}}$ | $\gamma_{\text{QD}}$ | $g$  |
|---------------------------------------|----------------------|----------------------|----------------------|----------------------|------|
| Weak coupling:<br>Figure 3            | 1.82                 | 1.85                 | 0.20                 | 0.06                 | 0.01 |
| Intermediate coupling:<br>Figure 4a,c | 1.93                 | 1.93                 | 0.20                 | 0.06                 | 0.10 |
| Intermediate coupling:<br>Figure 4b,d | 2.00                 | 2.03                 | 0.23                 | 0.08                 | 0.11 |
| Strong coupling:<br>Figure 5a,c       | 1.86                 | 1.88                 | 0.15                 | 0.10                 | 0.23 |
| Strong coupling:<br>Figure 5b,d       | 1.90                 | 1.91                 | 0.19                 | 0.13                 | 0.16 |
